# Supplementary material for: Thermally self-healing silicone-based networks with potential application in recycling adhesives
Source: Royal Society of Chemistry journal article supplement (doi:10.1039/c6ra14659g), 2016-01-01
Supplement: c6ra14659g1.pdf [file c6ra14659g1.pdf]

## Supporting Information

# Thermally Self-healing Silicone-based Networks with Potential Application in Recycling Adhesives

Zhiming Gou, Yujing Zuo, and Shengyu Feng\*

---

*Key Laboratory of Special Functional Aggregated Materials & Key Laboratory of Colloid and Interface Chemistry (Shandong University),  
Ministry of Education; School of Chemistry and Chemical Engineering, Shandong University, Jinan 250100, P.R. China.*

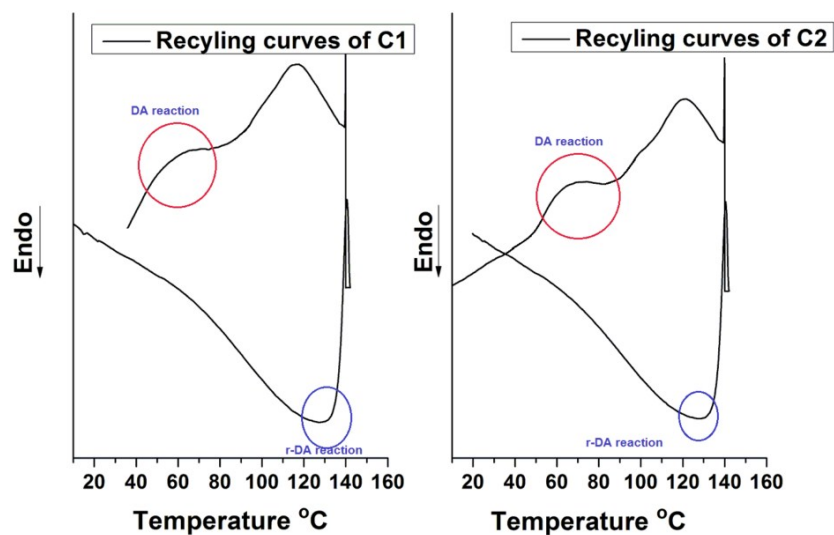

Figure S1. DSC curves for C1 and C2.

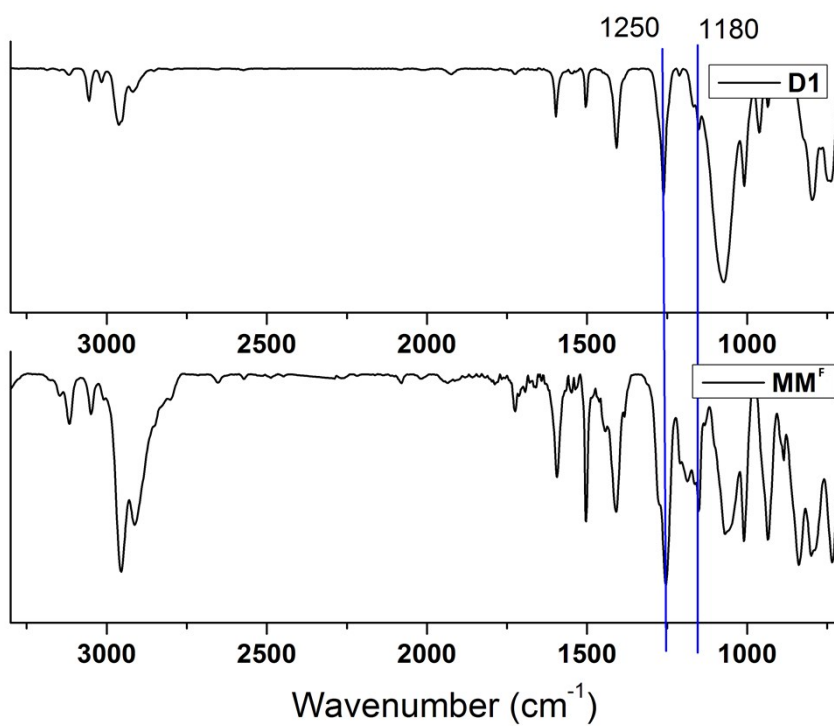

Figure S2. FTIR spectra of MM<sup>F</sup> and D1.

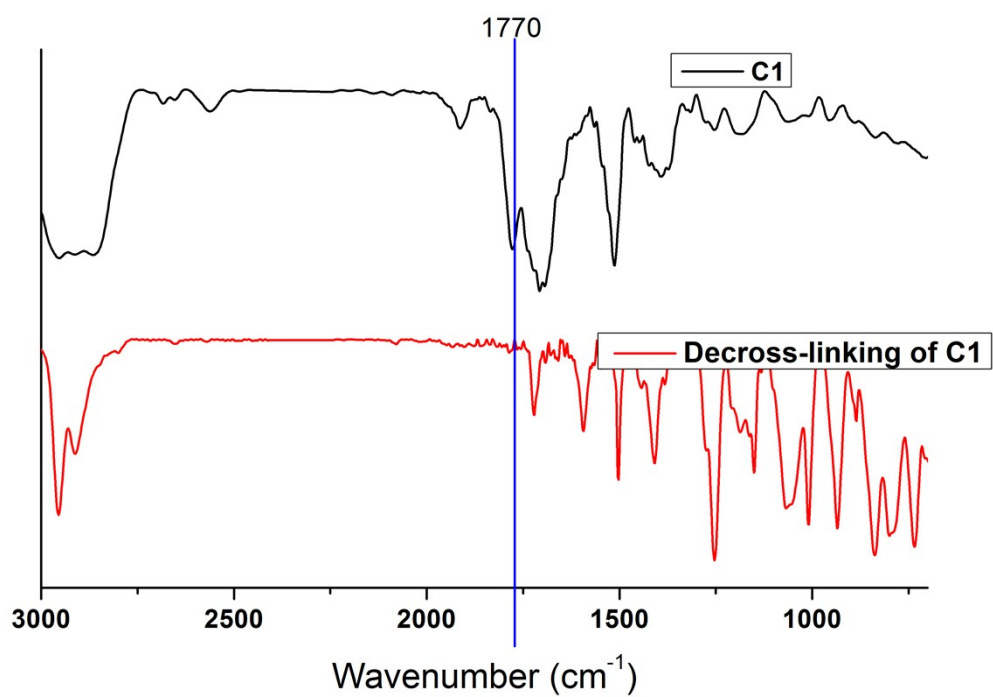

**Figure S3.** FTIR spectra of **C1** and the de-forming product of **C1**.

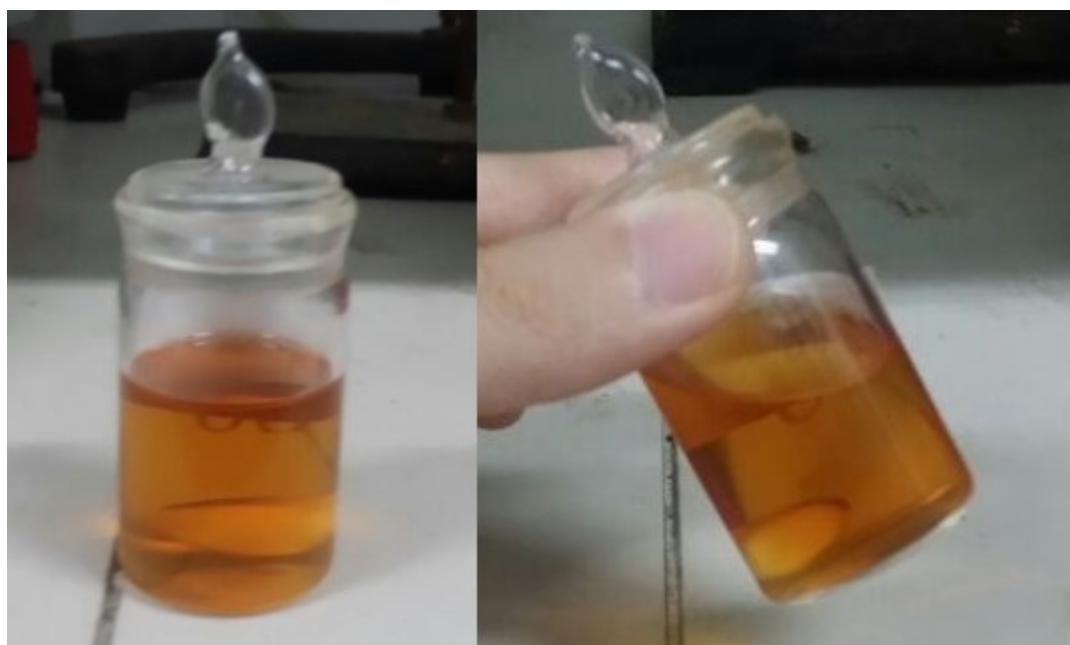

**Figure S4.** Images of the de-forming products of **C5** after heating and cooling down process dissolving in Toluene.
